# Supplementary material for: Disposable Pipette Extraction (DPX) Coupled to HPLC-DAD as an Alternative for the Determination of Phthalic Monoesters in Urine Samples
Source: MDPI journal article supplement (doi:10.3390/separations9100294), 2022-10-07
Supplement: s1 [file s1]

**Table S1.** Physicochemical properties of the analytes selected for this study.

| Analyte                              | Chemical Structure                                                                  | pKa  | Log P |
|--------------------------------------|-------------------------------------------------------------------------------------|------|-------|
| Monomethyl phthalate (MMP)           | 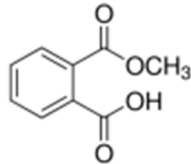  | 3.08 | 1.13  |
| Monobutyl phthalate (MBP)            |   | 3.08 | 2.96  |
| Monobenzyl phthalate (MBzP)          |   | 3.08 | 3.36  |
| Mono-(2-ethylhexyl) phthalate (MEHP) |  | 3.08 | 4.66  |

\*Data obtained from data base Chemcalize, Pubchem and HMDB.

**Table S2.** Experiments of the simplex lattice design performed to evaluate desorption solvent.

| Exp.  | Ultrapure water pH 8 (%) | MeOH (%) | ACN (%) |
|-------|--------------------------|----------|---------|
| 1     | 100                      | 0        | 0       |
| 2     | 0                        | 50       | 50      |
| 3     | 0                        | 100      | 0       |
| 4     | 0                        | 0        | 100     |
| 5 (C) | 33,3                     | 33,3     | 33,3    |
| 6     | 50                       | 50       | 0       |
| 7 (C) | 33,3                     | 33,3     | 33,3    |
| 8     | 50                       | 0        | 50      |
| 9 (C) | 33,3                     | 33,3     | 33,3    |

**Table S3.** Experiments performed for the evaluation of desorption step with a Doehlert design.

| Exp.  | Desorption cycles | ACN volume (μL) |
|-------|-------------------|-----------------|
| 1     | 1                 | 225             |
| 2     | 3                 | 150             |
| 3 (C) | 5                 | 225             |
| 4     | 7                 | 150             |
| 5     | 9                 | 225             |
| 6 (C) | 5                 | 225             |
| 7     | 7                 | 300             |
| 8     | 3                 | 300             |
| 9 (C) | 5                 | 225             |

**Table S4.** Experiments performed for the evaluation of the extraction step with a Doehlert design.

| Exp.  | Extraction cycles | Extraction cycle volume (μL) |
|-------|-------------------|------------------------------|
| 1     | 3                 | 500                          |
| 2     | 4                 | 300                          |
| 3 (C) | 5                 | 500                          |
| 4     | 6                 | 700                          |
| 5     | 7                 | 500                          |
| 6 (C) | 5                 | 500                          |
| 7     | 6                 | 300                          |
| 8     | 4                 | 700                          |
| 9 (C) | 5                 | 500                          |

**Table S5.** Experiments performed in the Youden method.

| Exp. | Urine volume (μL) | Sample pH | Extraction cycle volume (μL) | Extraction cycle | Washing cycles | ACN Volume (μL) | Desorption cycles |
|------|-------------------|-----------|------------------------------|------------------|----------------|-----------------|-------------------|
| 1    | 490               | 2.0       | 700                          | 7                | 2              | 225             | 1                 |
| 2    | 490               | 2.0       | 720                          | 7                | 3              | 250             | 2                 |
| 3    | 490               | 2.2       | 700                          | 8                | 2              | 250             | 2                 |
| 4    | 490               | 2.2       | 720                          | 8                | 3              | 225             | 1                 |
| 5    | 510               | 2.0       | 700                          | 8                | 3              | 225             | 2                 |
| 6    | 510               | 2.0       | 720                          | 8                | 2              | 250             | 1                 |
| 7    | 510               | 2.2       | 700                          | 7                | 3              | 250             | 1                 |
| 8    | 510               | 2.2       | 720                          | 7                | 2              | 225             | 2                 |

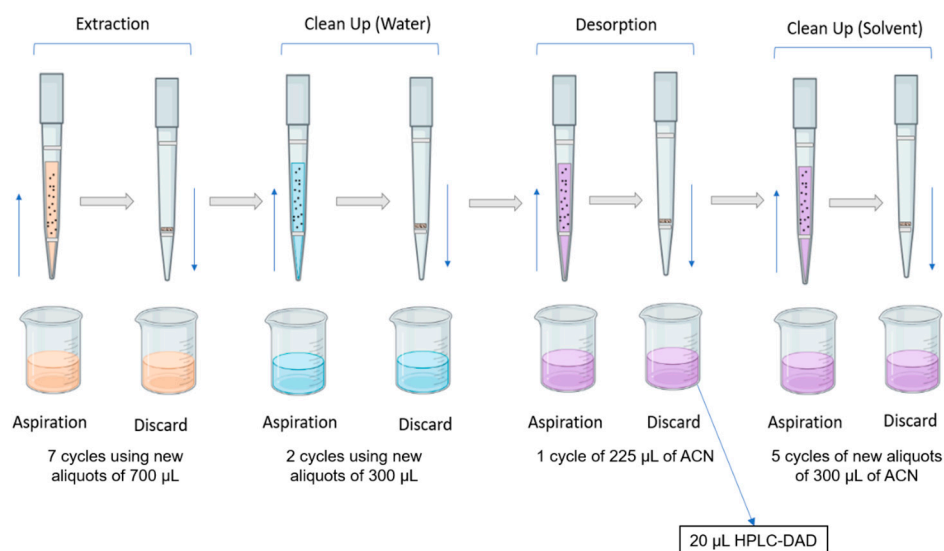**Figure S1.** A figure of the steps performed for the DPX procedure.

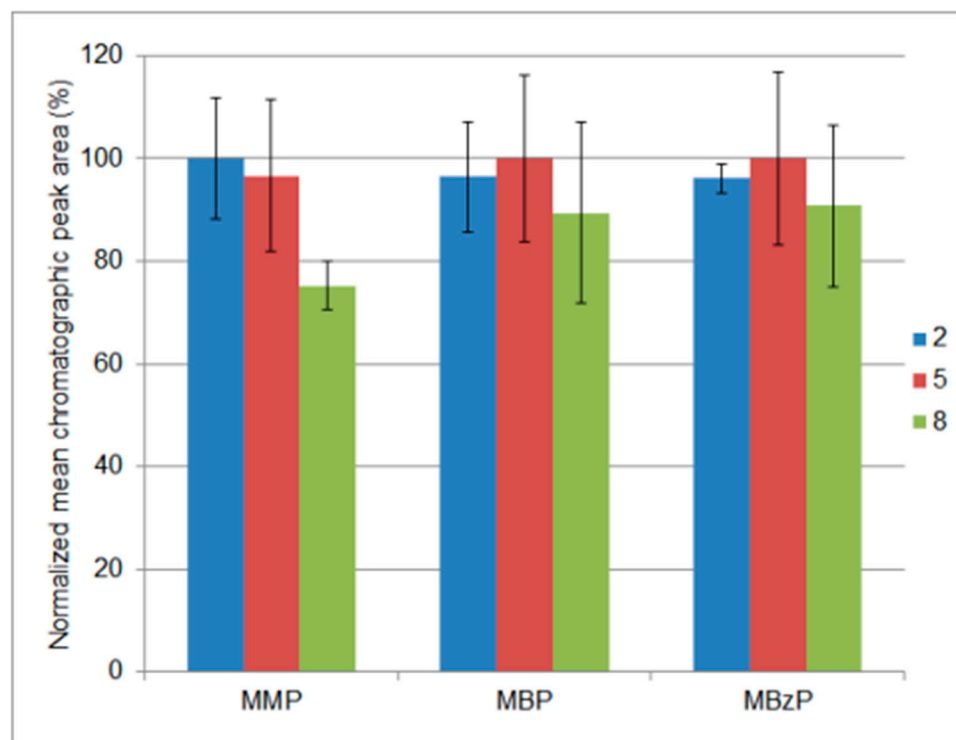

**Figure S2.** Bar graph obtained for the optimization of the washing cycles (2, 5 and 8). (Experimental conditions: 3.5 mL of urine adjusted to pH 3.0 and spiked at  $300 \mu\text{g L}^{-1}$ . Extraction was performed with 5 cycles of  $700 \mu\text{L}$  of sample using new aliquots, using variable washing cycles of  $300 \mu\text{L}$  of ultrapure water and desorption using 5 cycles of  $200 \mu\text{L}$  of ACN:MeOH (50:50, v:v)).

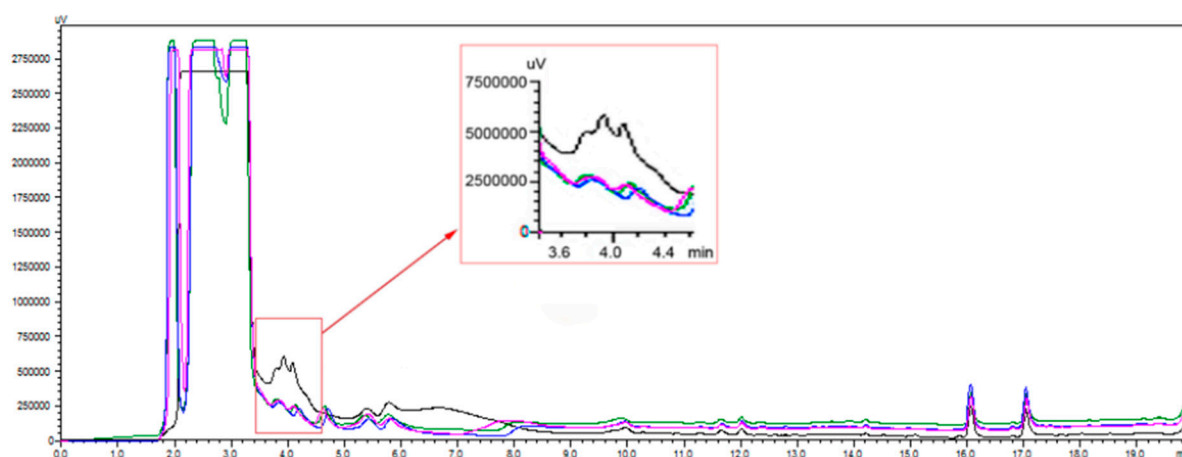

**Figure S3.** Comparative Chromatogram with detection wavelength of 210 nm using different washing cycles of ultrapure water between extraction and desorption, 2 cycles (pink), 5 cycles (blue) and 8 (green) and none (black).

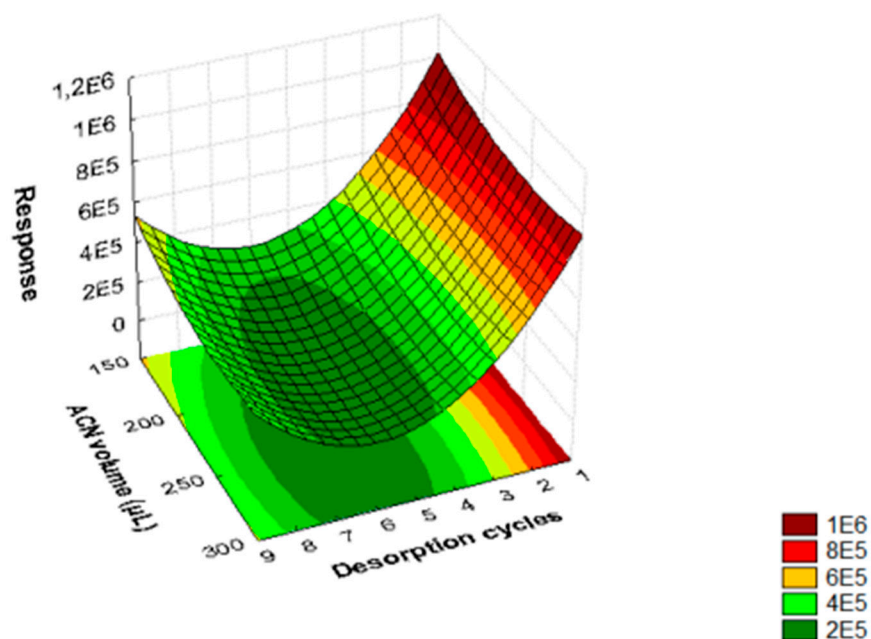

**Figure S4.** Response surface obtained for the Doehlert design used to evaluate desorption cycles and ACN volume. (Conditions: 3.5 mL of urine adjusted at pH 3.0 and spiked at  $300 \mu\text{g L}^{-1}$ . Extraction was performed with 5 cycles of  $700 \mu\text{L}$  of sample using new aliquots, followed by 2 cycles of  $300 \mu\text{L}$  of ultrapure water and desorption using variable number of cycles and ACN volume).

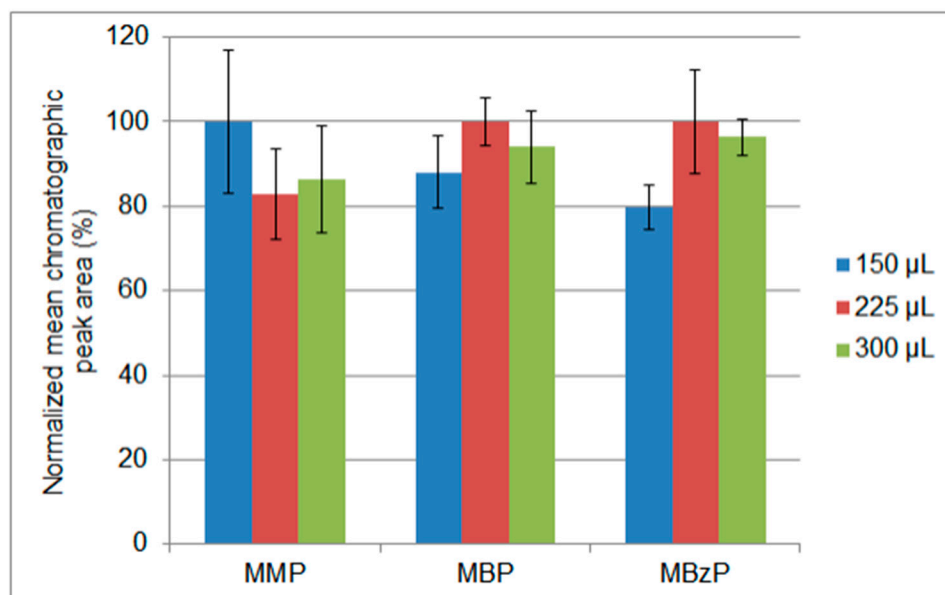

**Figure S5.** Bar graph obtained for the evaluation of ACN volume. (Conditions: 3.5 mL of urine adjusted at pH 3.0 and spiked at  $300 \mu\text{g L}^{-1}$ . Extraction was performed with 5 cycles of  $700 \mu\text{L}$  of sample using new aliquots, followed by 2 cycles of  $300 \mu\text{L}$  of ultrapure water and desorption using 1 cycle of different volumes of ACN).

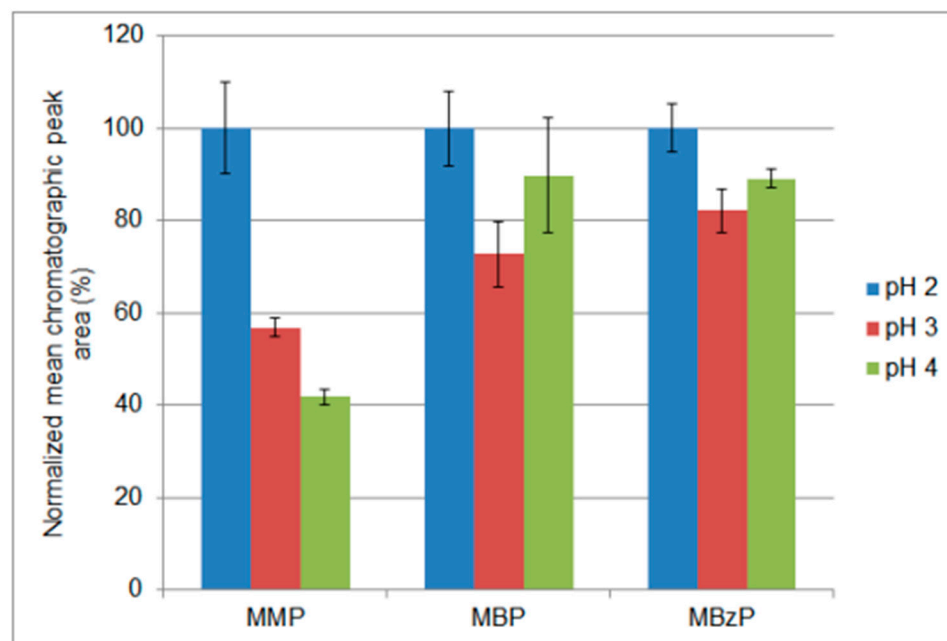

**Figure S6.** Bar graph obtained for the optimization of sample pH. (Experimental conditions: 4.9 mL of urine sample adjusted at variable pH and spiked at  $300 \mu\text{g L}^{-1}$ . Extraction was performed with 7 cycles of  $700 \mu\text{L}$  of sample for each cycle using new aliquots, followed by 2 cycles of  $300 \mu\text{L}$  of ultrapure water and desorption using 1 cycle of  $225 \mu\text{L}$  of ACN).

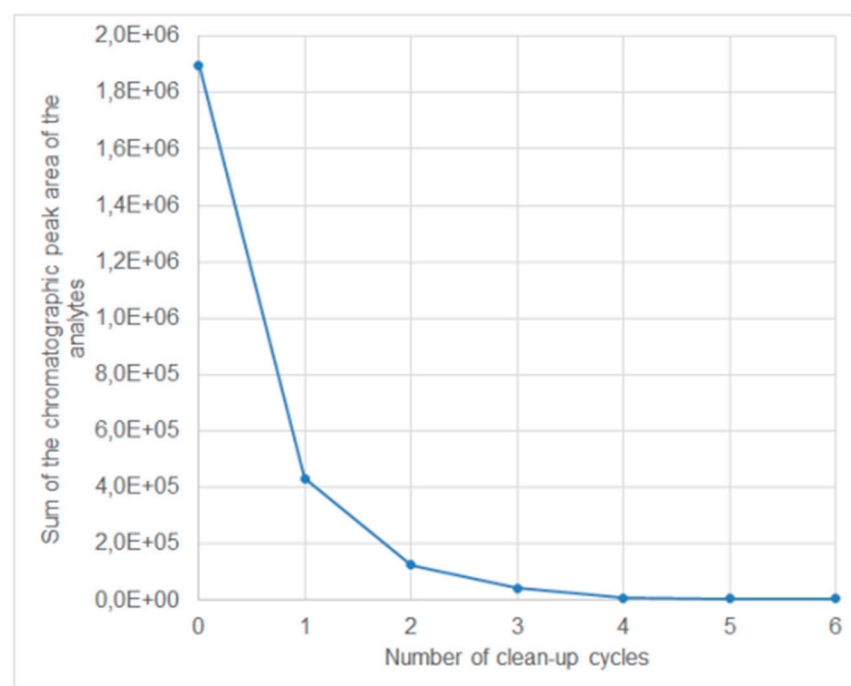

**Figure S7.** Graph obtained for the study of the clean-up step. (Experimental conditions: 4.9 mL of urine sample adjusted at pH 2.0 and spiked at  $300 \mu\text{g L}^{-1}$ . Extraction was performed with 7 cycles of  $700 \mu\text{L}$  of sample for each cycle using new aliquots, followed by 2 cycles of  $300 \mu\text{L}$  of ultrapure water and desorption using 1 cycle of  $225 \mu\text{L}$  of ACN).

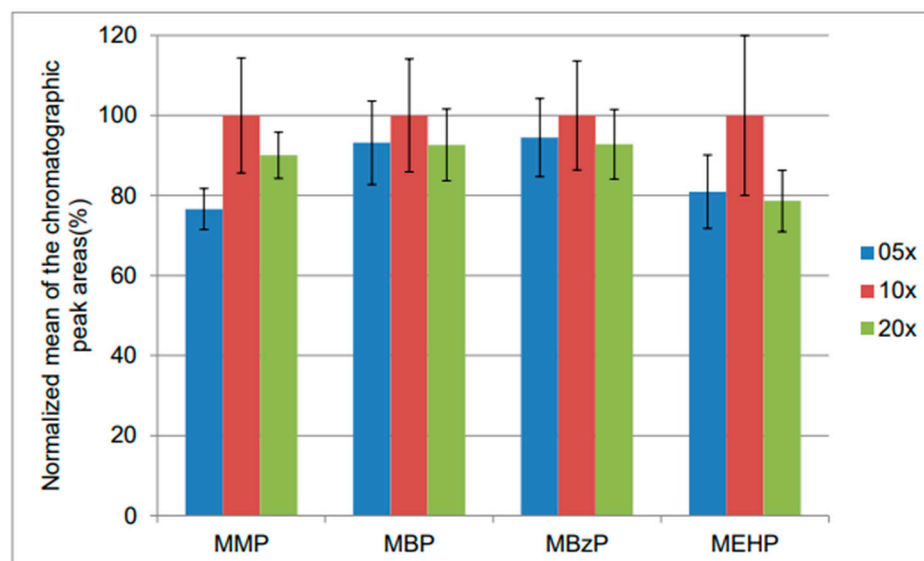

**Figure S8.** Bar graph obtained for urine dilution evaluation. (Experimental conditions: 4.9 mL of diluted urine sample adjusted at pH 2.0 and spiked at  $300 \mu\text{g L}^{-1}$ . Extraction was performed with 7 cycles of  $700 \mu\text{L}$  of sample for each cycle using new aliquots, followed by 2 cycles of  $300 \mu\text{L}$  of ultrapure water and desorption using 1 cycle of  $225 \mu\text{L}$  of ACN).

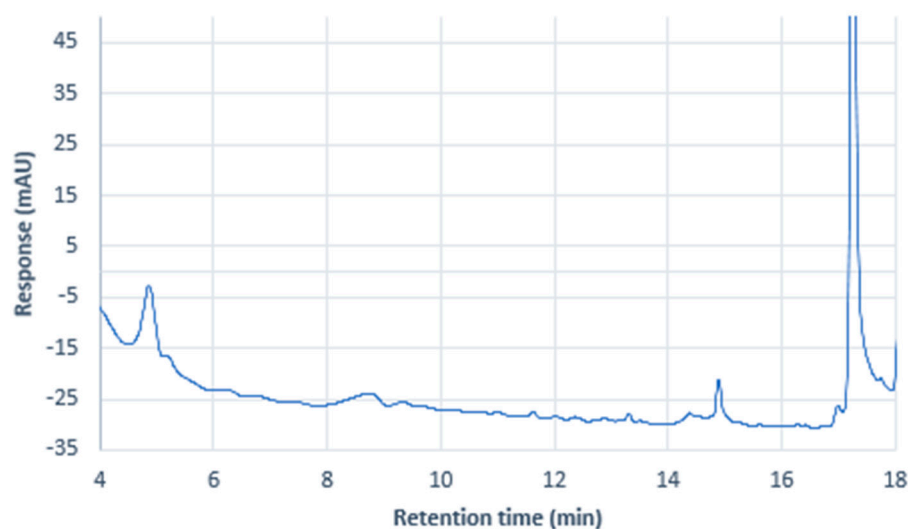

**Figure S9.** Chromatogram of a blank sample treated with the optimized procedure.
