# Supplementary material for: Disposable Pipette Extraction (DPX) Coupled to HPLC-DAD as an Alternative for the Determination of Phthalic Monoesters in Urine Samples
Source: MDPI journal article supplement (doi:10.3390/separations9100294), 2022-10-07
Supplement: s1 [file s1]

Archive with 1 entries (1 files):
- separations-1903481-supplementary.pdf
